# Supplementary material for: Trophic Nutrition in ICU Patients Undergoing High-Flow Oxygen Therapy and/or Noninvasive Mechanical Ventilation: The Nutri-Trophic Study
Source: MDPI journal article supplement (doi:10.3390/nu16091366), 2024-04-30
Supplement: s1 [file s1]

**Supplementary Materials:** The following supporting information can be downloaded at: [www.mdpi.com/xxx/s1](http://www.mdpi.com/xxx/s1), Table S1: Patient characteristics according to the need to discontinue nutritional therapy.

**Table S1.** Patient characteristics according to the need to discontinue nutritional therapy.

|                                      |  | Need to discontinue nutritional therapy |                   | p-Value |
|--------------------------------------|--|-----------------------------------------|-------------------|---------|
|                                      |  | No<br>N = 139                           | Yes<br>N = 10     |         |
| Age (years)                          |  | 62.5 ± 13.7                             | 64.0 ± 17.9       | 0.749   |
| Sex male                             |  | 96 (69.1)                               | 6 (60.0)          | 0.726   |
| Body mass index (kg/m <sup>2</sup> ) |  | 28.0 ± 5.6                              | 29.6 ± 5.1        | 0.387   |
| Apache-II score                      |  | 14 (10; 19)                             | 22 (16; 26)       | 0.007   |
| SOFA upon admission                  |  | 3 (2; 6)                                | 8 (7; 9)          | < 0.001 |
| SOFA on day 3                        |  | 3 (2; 5)                                | 6 (5; 7)          | 0.002   |
| Complications                        |  |                                         |                   |         |
| Tracheobronchitis                    |  | 12 (8.6)                                | 0                 | 1       |
| VAP                                  |  | 10 (7.2)                                | 0                 | 1       |
| Bacteremia                           |  | 12 (8.6)                                | 0                 | 1       |
| UTIs                                 |  | 9 (6.5)                                 | 0                 | 1       |
| Other infections                     |  | 8 (5.8)                                 | 1 (10.0)          | 0.474   |
| CRRT                                 |  | 12 (8.6)                                | 0                 | 1       |
| Prophylaxis_AGDMML                   |  | 122 (87.8)                              | 7 (70.0)          | 0.134   |
| Prokinetics                          |  | 21 (15.1)                               | 1 (10.0)          | 1       |
| Antimicrobial treatments             |  | 75 (54.0)                               | 6 (60.0)          | 0.755   |
| 90-Day mortality                     |  | 19 (13.7)                               | 3 (30.0)          | 0.168   |
| Oral feedings                        |  | 101 (75.9)                              | 9 (90.0)          | 0.454   |
| NGFs                                 |  | 35 (26.3)                               | 1 (10.0)          | 0.452   |
| Diarrhea                             |  | 11 (7.9)                                | 7 (70.0)          | < 0.001 |
| Gastric residue > 500 ml (n)         |  | 0                                       | 2 (20.0)          | 0.004   |
| Vomiting/regurgitation               |  | 1 (0.7)                                 | 0                 | 1       |
| Broncho-aspiration                   |  | 0                                       | 0                 | 1       |
| NG tube obstruction                  |  | 1 (0.7)                                 | 0                 | 1       |
| Abdominal distention                 |  | 2 (1.4)                                 | 2 (20.0)          | 0.023   |
| NG tube displacement                 |  | 4 (2.9)                                 | 0                 | 1       |
| EN discontinuation                   |  | 0                                       | 10 (100.0)        | < 0.001 |
| Oxygen therapy type:                 |  |                                         |                   | 1       |
| HFNC                                 |  | 128 (92.1)                              | 10 (100.0)        |         |
| NIMV                                 |  | 11 (7.9)                                | 0                 |         |
| ICU days                             |  | 9 (6; 15)                               | 10 (8; 18)        | 0.267   |
| Hospital days                        |  | 14 (8; 23)                              | 24 (22; 25)       | 0.002   |
| HFNC days                            |  | 3 (2; 4)                                | 4 (2; 8)          | 0.28    |
| NIMV days                            |  | 4 (2; 6)                                | 5 (3; 8)          | 0.17    |
| Albumin (g/dL)                       |  | 3 (3; 3)                                | 3 (3; 3)          | 0.463   |
| Prealbumin (mg/dL)                   |  | 16 (10; 21)                             | 12 (8; 15)        | 0.2     |
| Retinol (UI)                         |  | 4 (2; 5)                                | 4 (4; 6)          | 0.229   |
| Transferrin (md/dL)                  |  | 155 (123; 176)                          | 117 (103; 149)    | 0.2     |
| Bilirubin (mg/dL)                    |  | 0.52 (0.35; 0.70)                       | 1.12 (0.43; 1.57) | 0.03    |
| AST (U/L)                            |  | 38 (22; 53)                             | 22 (20; 64)       | 0.489   |
| ALT (U/L)                            |  | 38 (20; 60)                             | 20 (15; 43)       | 0.117   |

|                                       |  | Need to discontinue nutritional therapy |                        |         |
|---------------------------------------|--|-----------------------------------------|------------------------|---------|
|                                       |  | No<br>N = 139                           | Yes<br>N = 10          | p-Value |
| GGT (U/L)                             |  | 79 (59; 102)                            | 130 (73; 167)          | 0.085   |
| ALP(U/L)                              |  | 66 (38; 137)                            | 131 (79; 433)          | 0.018   |
| INR                                   |  | 1.10 (1.01; 1.18)                       | 1.12 (1.05; 1.20)      | 0.537   |
| Prothrombin (sec)                     |  | 13 (12; 15)                             | 13 (13; 21)            | 0.338   |
| Urea (mg/dL)                          |  | 50 (38; 69)                             | 144 (101; 201)         | < 0.001 |
| Creatinine (mg/dL)                    |  | 0.79 (0.61; 1.10)                       | 1.54 (0.91; 2.53)      | 0.013   |
| Daily data *                          |  |                                         |                        |         |
| Energy target (Kcal)                  |  | 1811 (1500; 2125)                       | 2075 (1488; 2422)      | 0.489   |
| Volume of enteral administration (ml) |  | 450 (288; 500)                          | 265 (142; 546)         | 0.223   |
| Enteral intake (Kcal)                 |  | 531 (302; 600)                          | 318 (131; 656)         | 0.297   |
| Ratio of energy intake / target       |  | 0.28 (0.19; 0.36)                       | 0.24 (0.07; 0.37)      | 0.358   |
| Parenteral dextrose intake (Kcal)     |  | 76 (0; 200)                             | 33 (1; 54)             | 0.23    |
| Prescribed protein (g/day)            |  | 50 (50; 90)                             | 82 (45; 119)           | 0.212   |
| Protein intake (g/day)                |  | 48 (25; 50)                             | 74 (13; 96)            | 0.263   |
| Ratio of protein intake / target      |  | 0.80 (0.49; 1.00)                       | 0.93 (0.55; 1.00)      | 0.837   |
| Gastric residue (ml) (n)              |  | 62 (50; 125) (n=23)                     | 75 (62; 112) (n=3)     | 0.717   |
| Total kcal intake (Kcal)              |  | 600 (460; 733)                          | 849 (184; 1137)        | 0.378   |
| Caloric intake (Kcal / kg)            |  | 7 (5; 10)                               | 9 (3; 14)              | 0.59    |
| Ratio of total energy intake / target |  | 0.31 (0.23; 0.43)                       | 0.62 (0.12; 0.81)      | 0.297   |
| PN kcal intake (n)                    |  | 1518 (864; 1552) (n=3)                  | 1125 (642; 1659) (n=3) | 0.827   |
| PN protein intake (g) (n)             |  | 74 (50; 87) (n=3)                       | 84 (84; 93) (n=3)      | 0.275   |
| Propofol kcal intake (n)              |  | 82 (18; 143) (n=4)                      | (n=0)                  |         |
| Glycemia (mg/dL)                      |  |                                         |                        |         |
| Median                                |  | 129 (111; 153)                          | 140 (134; 154)         | 0.306   |
| Minimum                               |  | 111 (92; 128)                           | 104 (96; 128)          | 0.955   |
| Maximum                               |  | 152 (127; 190)                          | 164 (149; 178)         | 0.359   |

(\*) Daily data for each patient are summarized as medians. Data are presented as the means  $\pm$  SD, frequencies (%), and medians (IQR). Apache: acute physiology and chronic health evaluation; SOFA: sequential organ failure assessment; VAP: ventilator-associated pneumonia; UTIs: urinary tract infections; CRRT: continuous renal replacement therapy; AGDML: acute gastroduodenal mucosal lesions; NG: nasogastric; NGF: nasogastric tube feeding; EN: enteral nutrition; HFNC: high-flow nasal cannulas; NIMV: noninvasive mechanical ventilation; AST: aspartate aminotransferase; ALT: alanine aminotransferase; GGT: gamma glutamyl transpeptidase; ALP: alkaline phosphatase; INR: international normalized ratio; PN: parenteral nutrition.

The median estimated energy expenditure was 1811 kcal, and there were no significant differences among the groups studied. The median amount of protein administered was 45 g/day, with significantly higher values for patients who had no interruptions in trophic enteral therapy ( $p < 0.05$ ). Gastric residual was negligible in both studied groups, with a median of 69 ml, and only two patients had residual values greater than 500 ml.

The median amount of daily kilocalories administered to patients via trophic feedings was 520 ml, the median protein intake was 50 g, and there were no significant differences between patients who did and did not experience interruptions in the trophic feedings. There were also no significant differences between BMI, albumin, prealbumin, retinol, transferrin, and liver enzymes among the groups studied.

One hundred and ten patients received oral trophic feedings, thirty-six patients received nasogastric tube feedings, and three mixed feedings. There were no significant differences in required interruptions of enteral nutrition administration. Table 3 also shows the daily data for the amounts of both prescribed and administered calories and protein, as well as the ratio of prescribed to administered. There were also no statistically significant differences among the groups studied. Propofol was administered to four patients (median kcal: 82 ml), none of whom required interruptions in enteral nutrition administration. In addition, six patients received parenteral nutrition, three of whom required an interruption in enteral nutrition administration.
